# Supplementary material for: Metal-Chelating Self-Assembling Peptide Nanofiber Scaffolds for Modulation of Neuronal Cell Behavior
Source: MDPI journal article supplement (doi:10.3390/mi14040883), 2023-04-19
Supplement: s1 [file s1]

Supplementary Material

# Metal Chelating Self-assembling Peptide Nanofiber Scaffolds for Modulation of Neuronal Cell Behavior

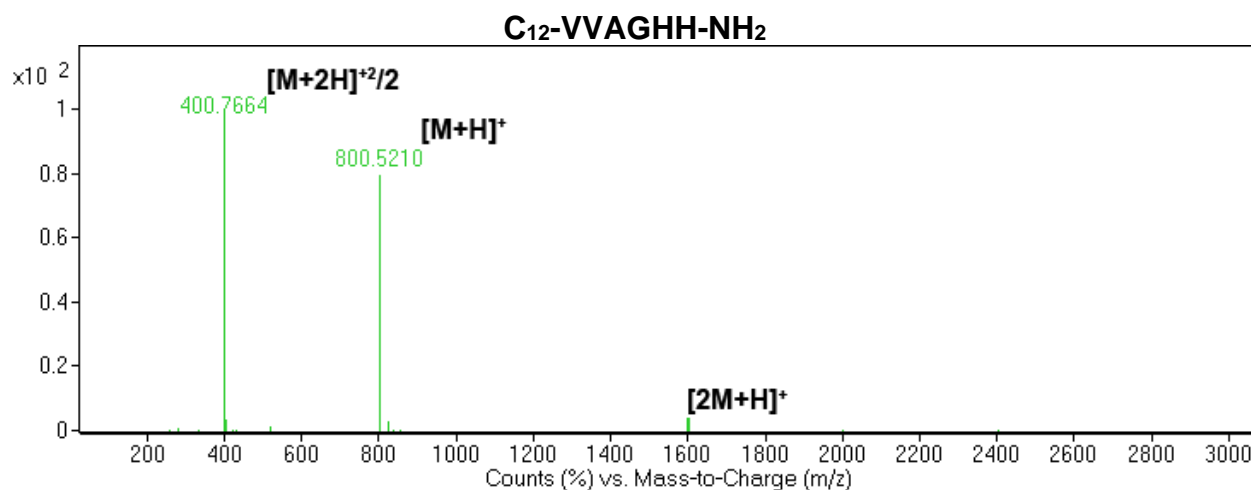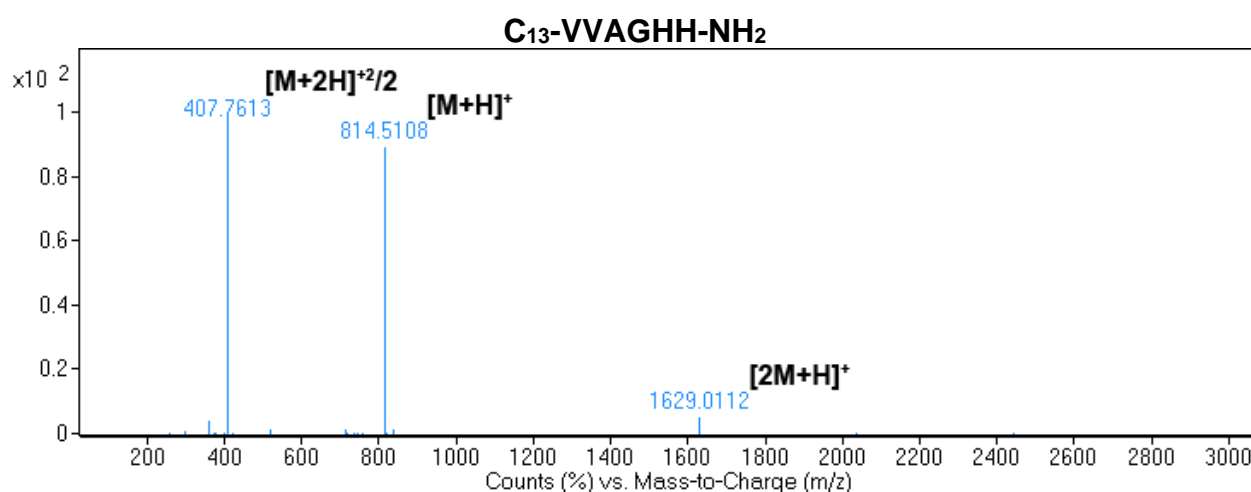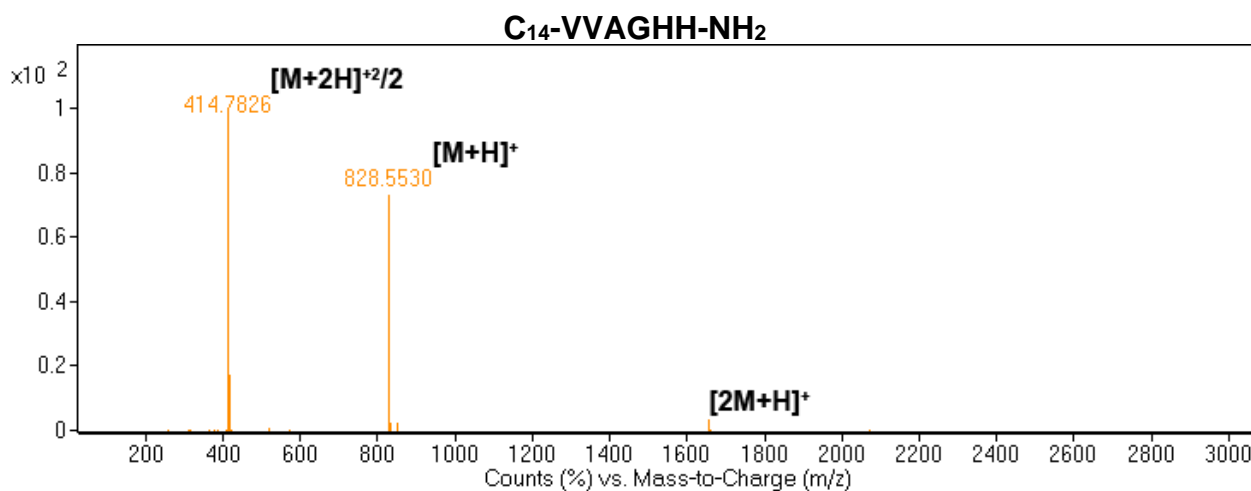

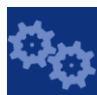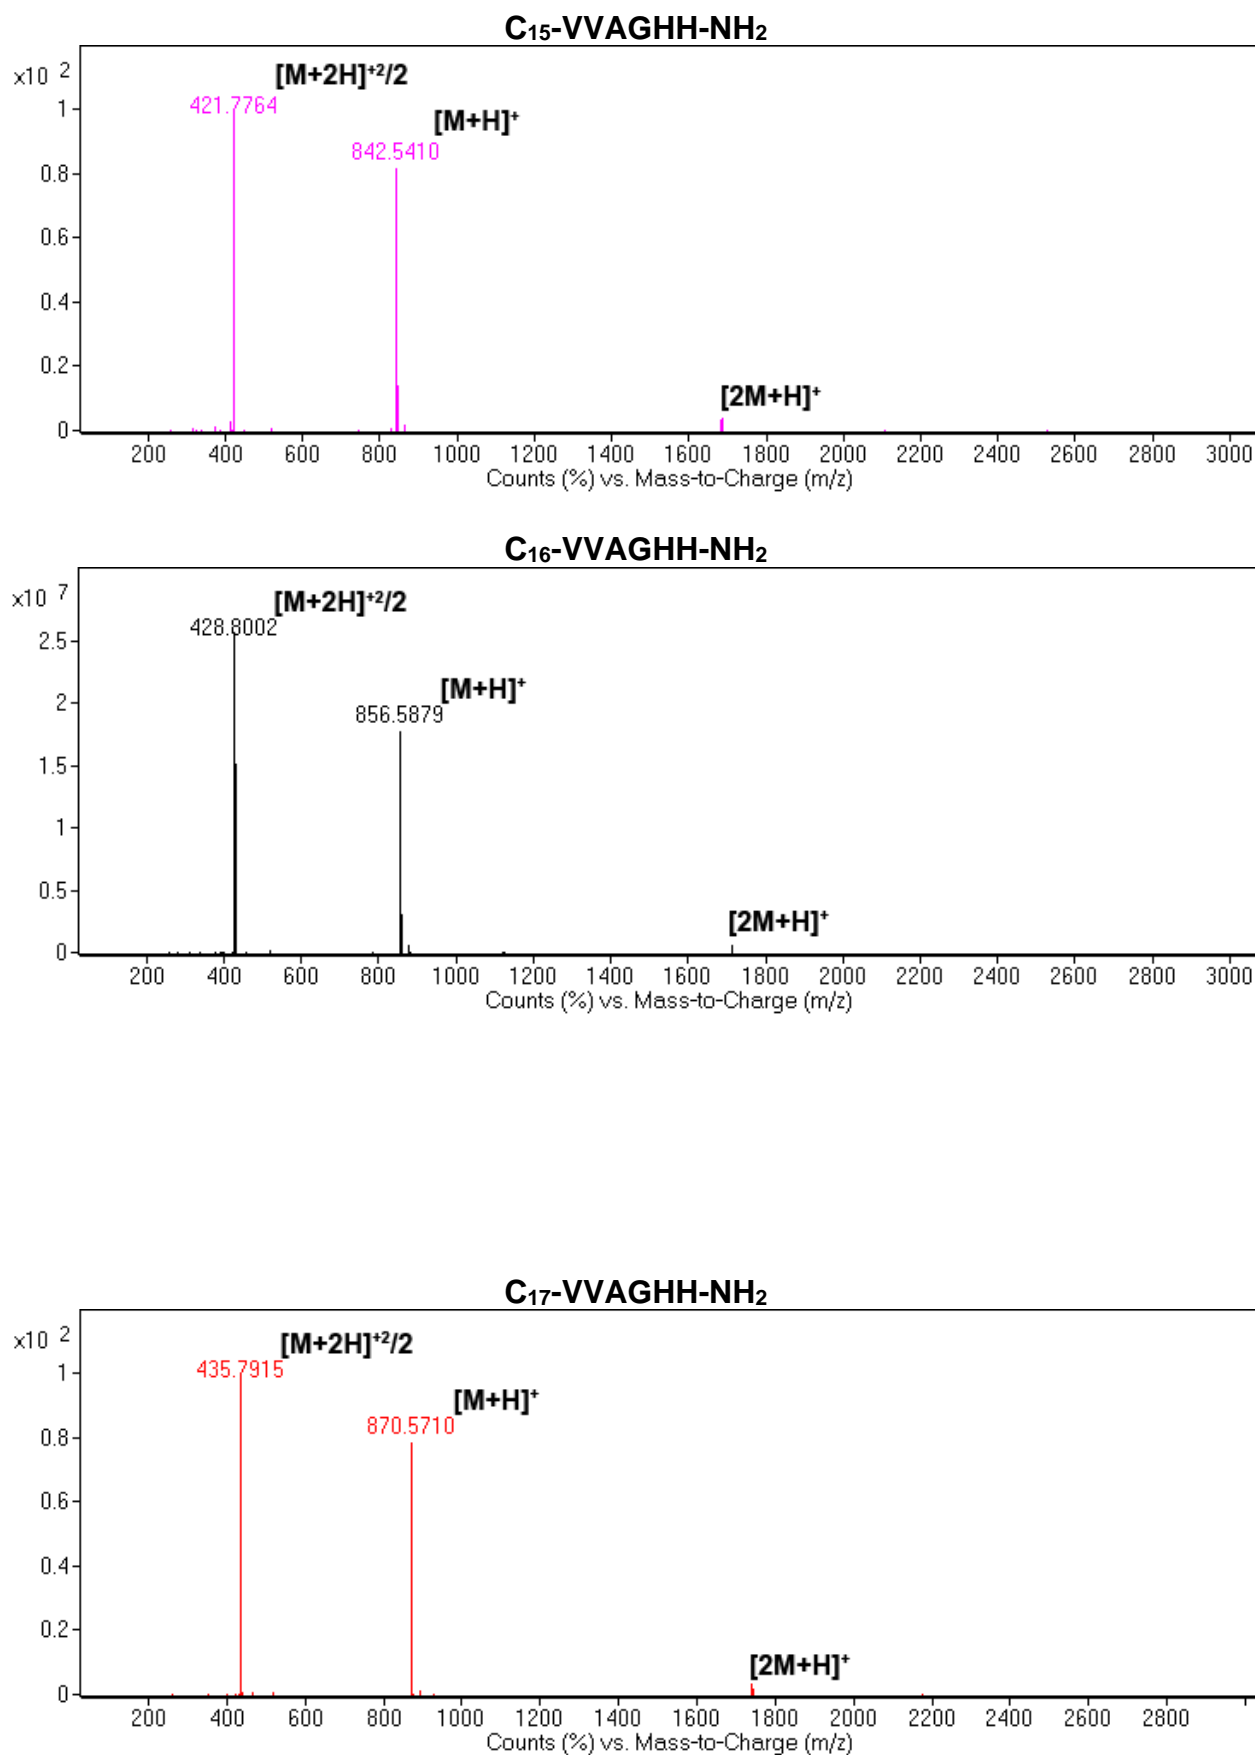

**Figure S1.** Mass spectra of synthesized peptide amphiphiles. The m/z values corresponding to [M+H]<sup>+</sup> (target peak), [M+2H]<sup>2+</sup>/2, and [2M+H]<sup>+</sup> ionized species are detected.

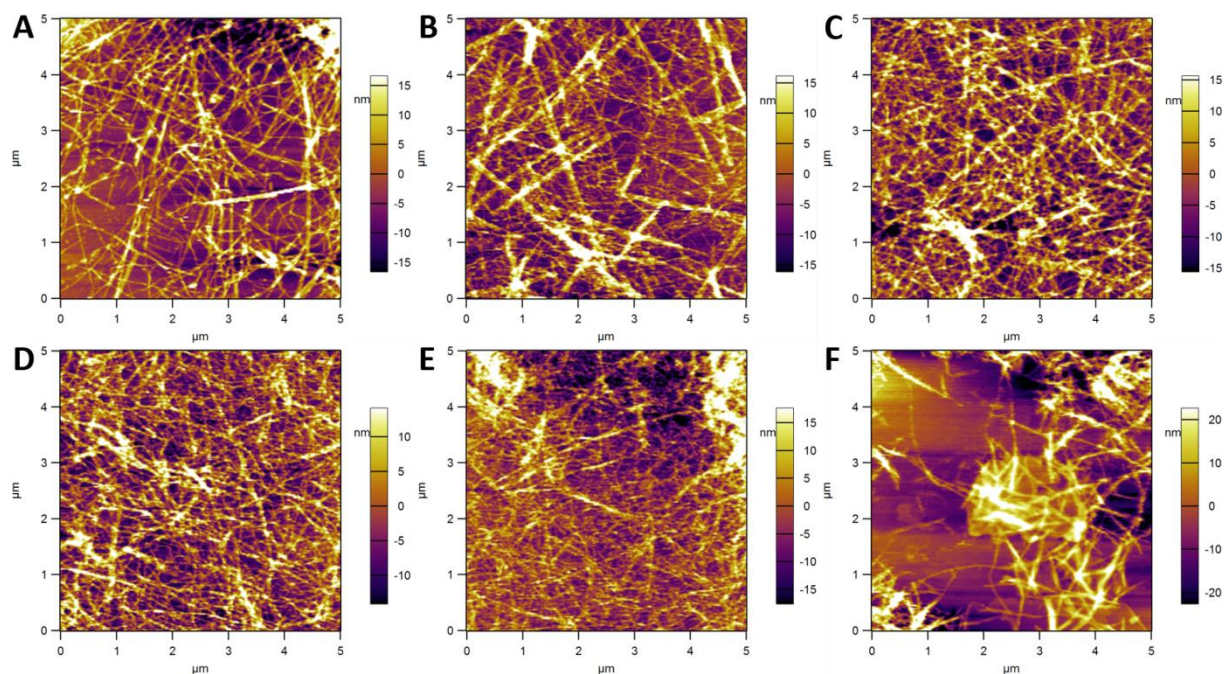

**Figure S2.** Atomic force microscopy images of C<sub>12</sub>PA (A), C<sub>13</sub>PA (B), C<sub>14</sub>PA (C), C<sub>15</sub>PA (D), C<sub>16</sub>PA (E), and C<sub>17</sub>PA (F).

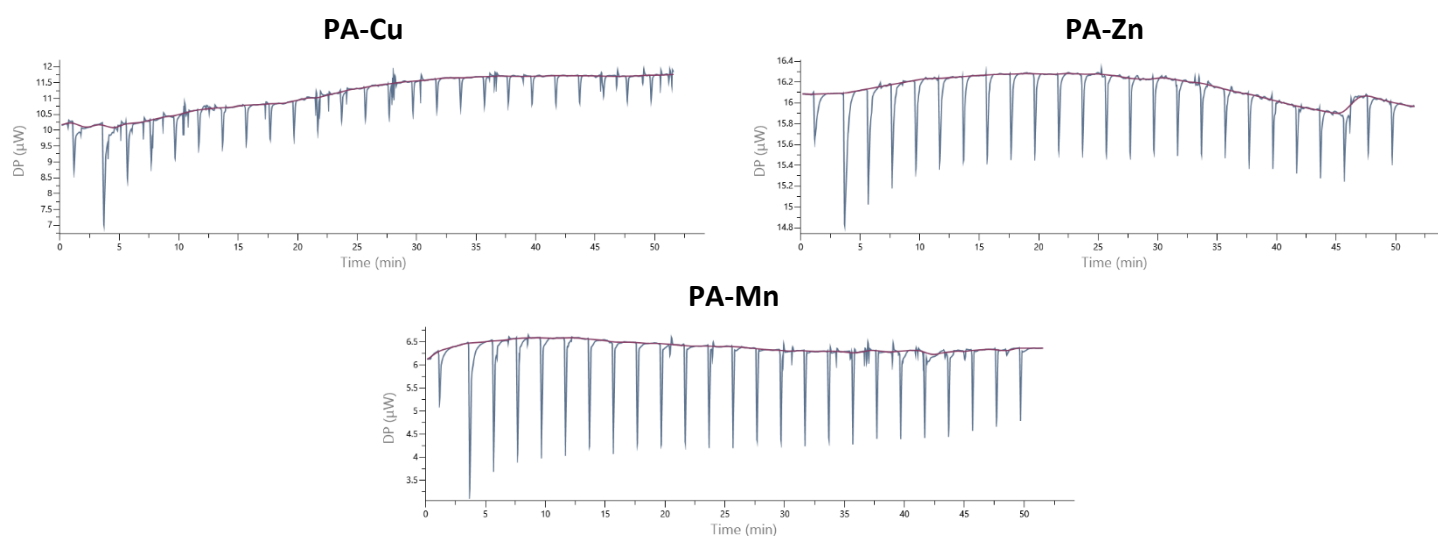

**Figure S3.** Binding of amphiphilic peptides to divalent metals (Cu, Zn, or Mn) according to isothermal titration calorimetry (50 mM HEPES, pH = 5.5, 37 °C). Integrated data for the titration after subtraction of control are shown.

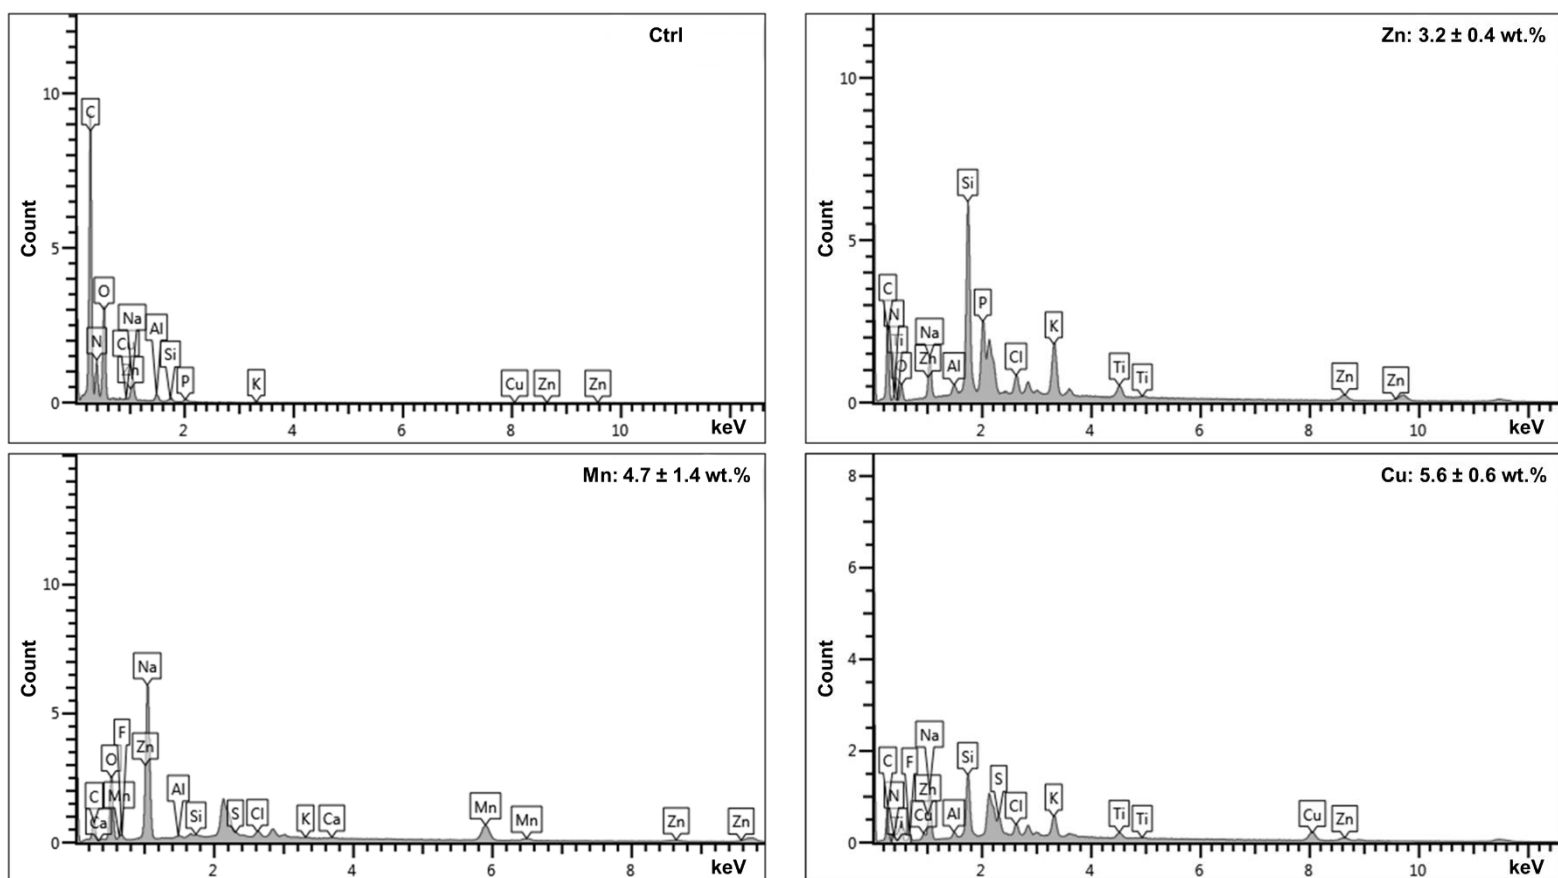

Figure S4. SEM-EDX analysis of elemental composition of TM-modified PA gels.

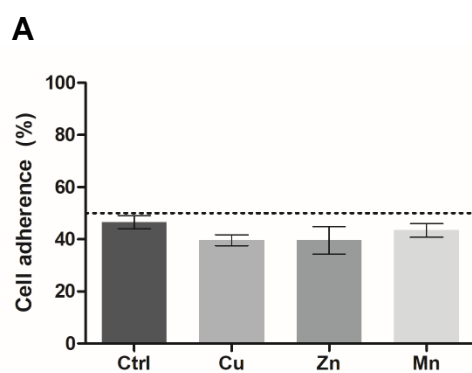

**B**

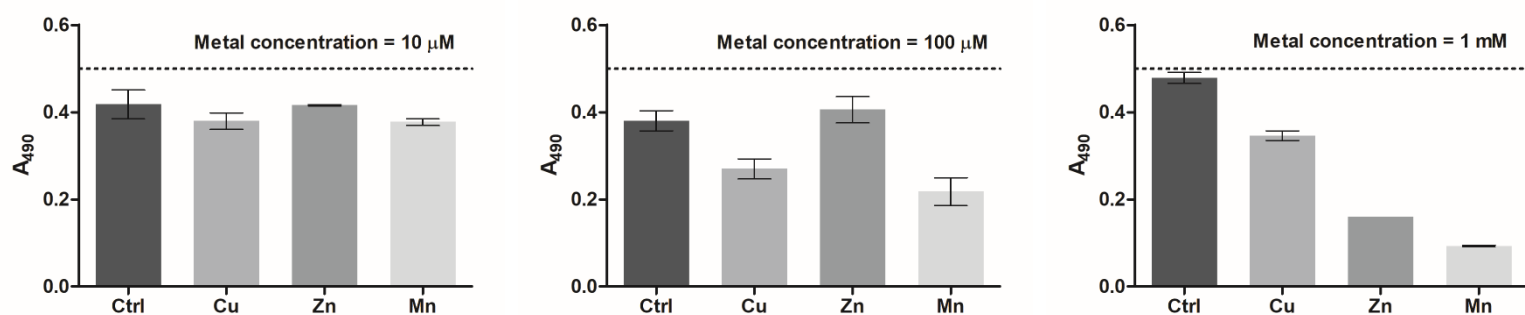

**Figure S5.** **A.** Adherence of 3T3 fibroblasts on the surface of trace metal-modified PA matrices after 4 h incubation (% of the total cell number). **B.** Viability of 3T3 fibroblasts cultured on trace metal-modified PA matrices (metal concentration was 10, 100, or 1000  $\mu$ M), according to MTS test, 24 h post-seeding. Dotted line shows the cell adherence (%) (A) or cell viability signal (B) on the polystyrene surface of tissue culture plate.

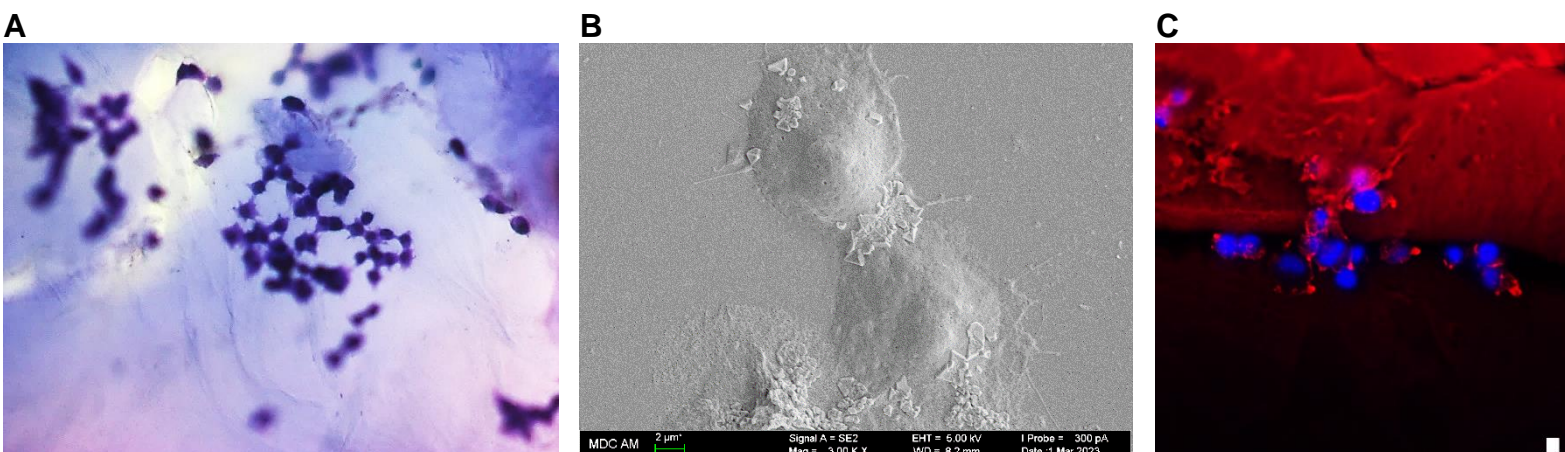

**Figure S6.** Images of fixed PC-12 cells on TM-modified PA matrices visualized at 24 h post-seeding using bright-field microscopy (A), scan electron microscopy (B), and laser scan confocal microscopy (C). The cells were stained with cresyl violet (bright-field microscopy) or phalloidin CruzFluor™ 647 conjugate (LSCM) prior visualization.
